# Supplementary material
Source: HighWire-hosted journal article supplement (https://jnm.snmjournals.org/highwire/filestream/104225/field_highwire_adjunct_files/0/256982_Supplemental_Data.pdf)
Supplement: 256982_Supplemental_Data.pdf [file 256982_Supplemental_Data.pdf]

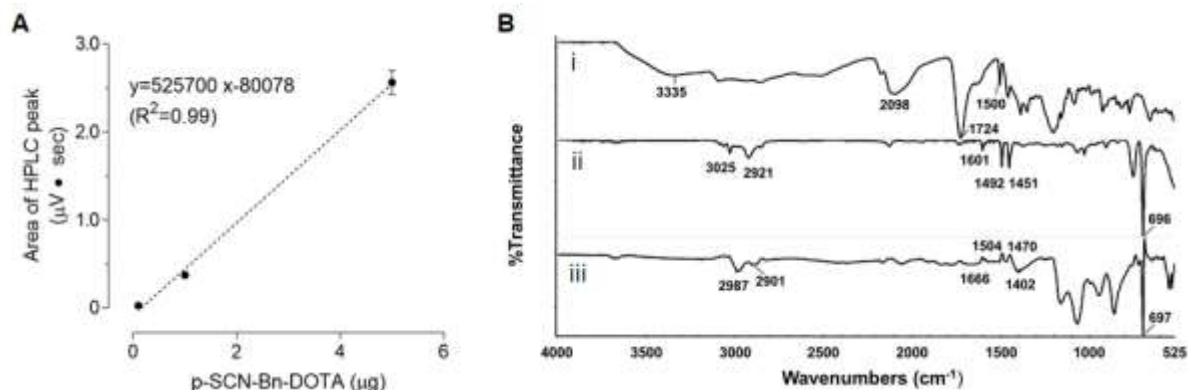

Supplemental Fig. 1. Chemical analysis of DOTA-polystyrene for confirmation of DOTA-conjugation. (A) Standard area curve of three different concentration of *p*-SCN-Bn-DOTA using high performance liquid chromatography ( $n=3$ ) and moles of DOTA per polystyrene (mg) was determined using a standard curve. (B) Fourier-transform infrared spectrum, (i) *p*-SCN-Bn-DOTA, at  $3335\text{ cm}^{-1}$  the presence of amine groups was observed and the isothiocyanate motif vibration was shown at  $2098\text{ cm}^{-1}$ . At  $1724\text{ cm}^{-1}$  the C=O stretch and at  $1500\text{ cm}^{-1}$  the aromatic C-C stretch was identified. The C-H stretch at  $1400\text{ cm}^{-1}$  and at C-N were identified (ii) amino-polystyrene, the C-H stretch was assigned at  $3000\text{-}2800\text{ cm}^{-1}$  and the N-H bend was observed at  $1601\text{ cm}^{-1}$  and the C-C stretch was observed at  $1600\text{-}1400\text{ cm}^{-1}$ . At  $720\text{-}685\text{ cm}^{-1}$  the aromatic bend was shown. (iii) DOTA-polystyrene, the isothiocyanate region ( $2098\text{ cm}^{-1}$ ) from *p*-SCN-Bn-DOTA was disappeared. At  $3000\text{-}2800\text{ cm}^{-1}$  the C-H stretch and at  $1600\text{-}1400\text{ cm}^{-1}$  the C-C stretch were observed. At  $720\text{-}685\text{ cm}^{-1}$  the aromatic bend was shown.

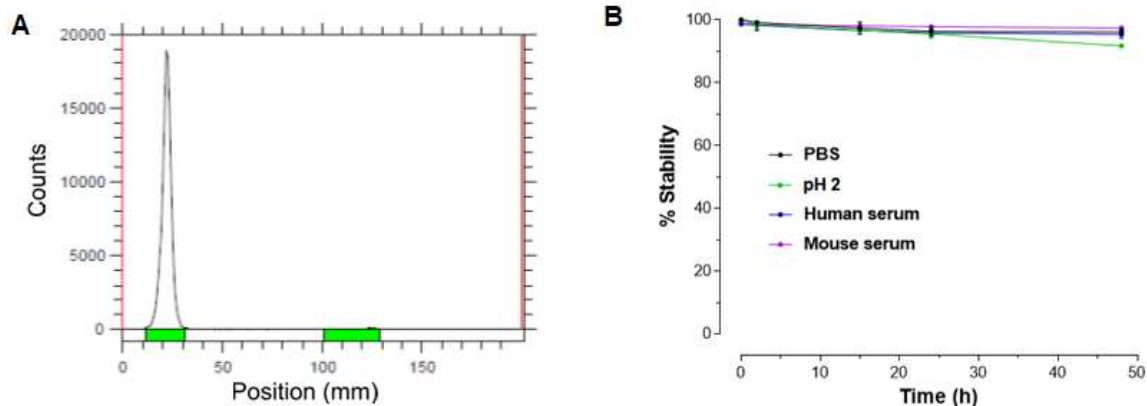

Supplemental Fig. 2. Radiochemical yield and stability of  $[^{64}\text{Cu}]\text{Cu-DOTA-polystyrene}$ . (A) Standard area curve of three different concentration of  $p\text{-SCN-Bn-DOTA}$  using HPLC ( $n=3$ ) and moles of DOTA per polystyrene (mg) was determined using a standard curve. (B) Radiochemical yield was analyzed using radioTLC developed in 0.1 M citric acid (left peak is  $[^{64}\text{Cu}]\text{Cu-DOTA-polystyrene}$  and right peak is  $^{64}\text{Cu}$ ). (C) Relative stability results of  $[^{64}\text{Cu}]\text{Cu-DOTA-polystyrene}$  in PBS, pH 2 buffer, human serum, or mouse serum ( $n=3$ ).

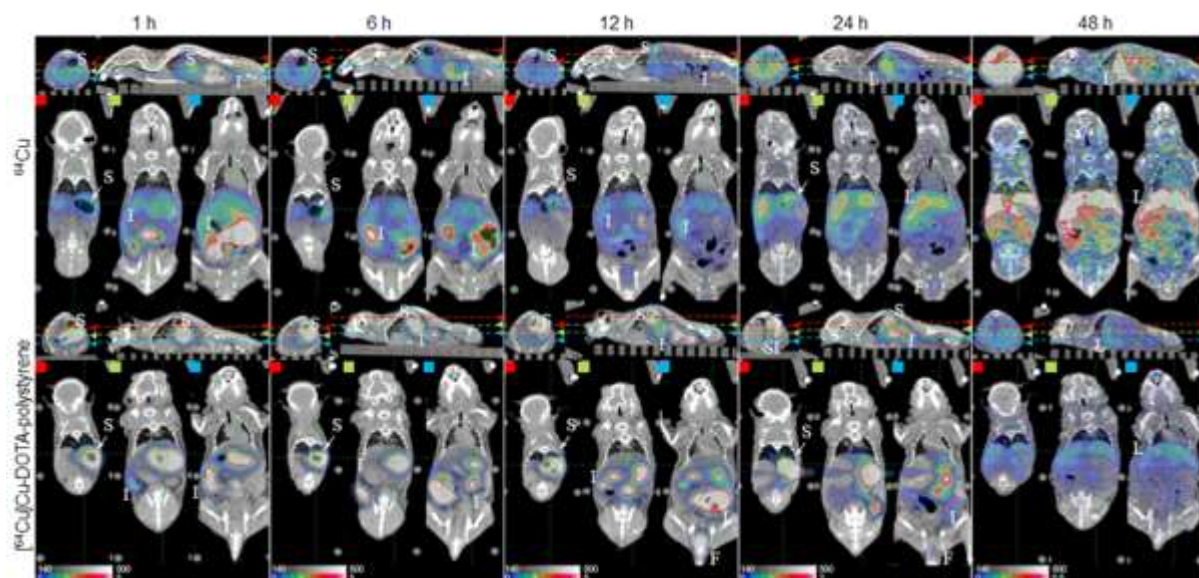

Supplemental Fig. 3. The representative coronal, sagittal, and transverse image of PET/CT at 1, 6, 12, 24, and 48 h post administration of  $[^{64}\text{Cu}]\text{Cu}$ -DOTA-polystyrene or  $^{64}\text{Cu}$ . The image color map shows SUV value. Red, green, and blue lines indicate the same slice at different location (S, stomach; I, Intestine; L, liver; F, feces).

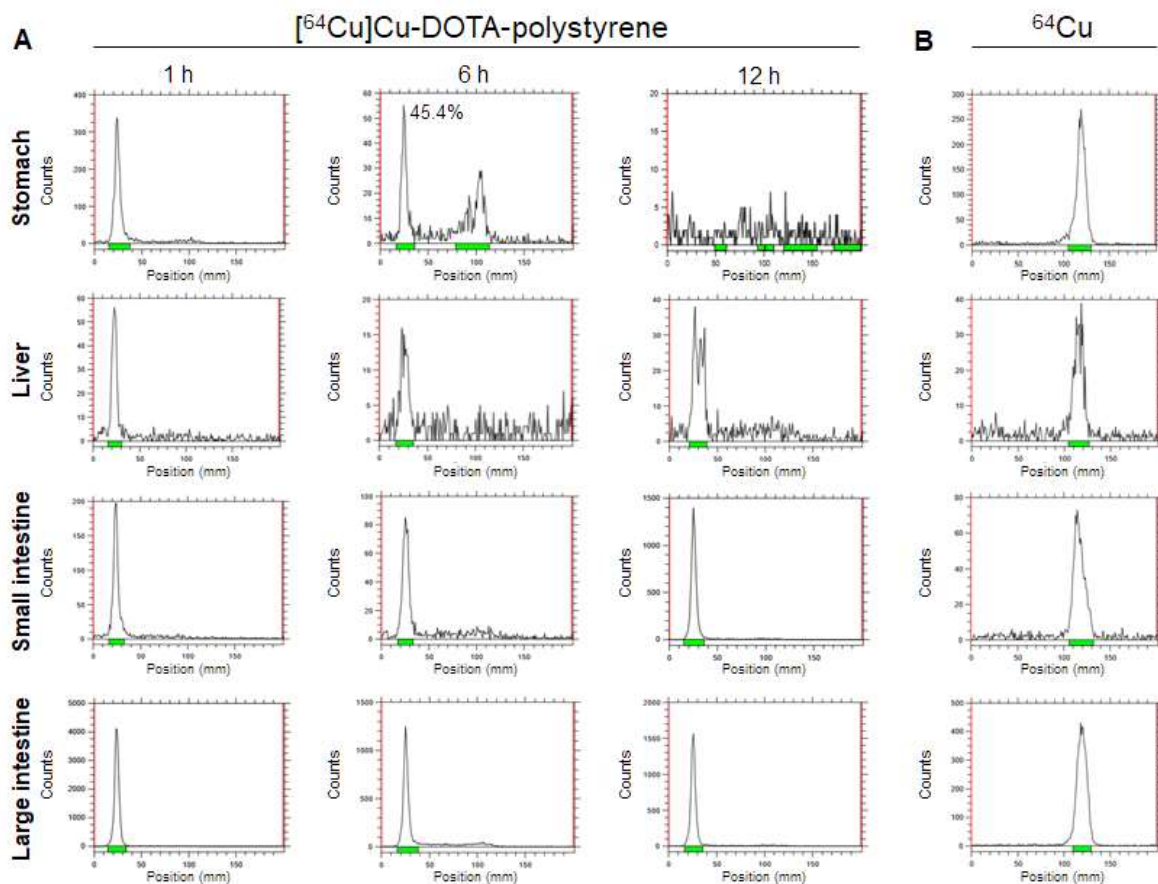

Supplemental Fig. 4. *Ex vivo*-radioTLC analysis of homogenized tissues at 1, 6, and 12 h after oral administration of  $[^{64}\text{Cu}]\text{Cu-DOTA-polystyrene}$  (A) and  $[^{64}\text{Cu}]\text{CuCl}_2$  (B). Instant TLCs were developed in 0.1 M citric acid (left peak is  $[^{64}\text{Cu}]\text{Cu-DOTA-polystyrene}$  and right peak is  $^{64}\text{Cu}$ ).
